# Supplementary material
Source: MDPI journal article supplement (https://www.mdpi.com/2073-4336/9/3/55)
Supplement: s1 [file s1]

# Decision Task

# Session Rules

- **NO** talking or any sounds
  - **Raise hand** if you have any questions at any point during the session
  - **WAIT** for someone to **come to you**
  - **DO NOT** ask your questions out loud
- **NO** looking around
- **NO** cellphones (PLEASE SWITCH THEM OFF)

# Payment

- **R20** for showing up
- Experimental Currency Tokens ( or simply “**tokens**”)
- Will be converted into rands at the end of the session
- Earnings min: R45
- Earnings max: R275

# Consent

- Voluntarily agree to participate
- Personal information will be kept confidential.
- Please read and sign consent forms

# Session Outline

- **9** periods
- ***Two*** tasks
- Task 1 in ***Period 1***
- Task 2 in ***Periods 2 to 9***

# TASK 1: PART 1

PERIOD 1

# Task 1

- **Two** Parts
- **Randomly** matched with someone else in the session for the **whole period (both Part 1 and Part 2)**
- Decisions made in each part do **not** affect decisions in other part
- Part 1 **or** Part 2 will be used to **randomly** determine payment

# Part 1 of Task 1

- Push ***or*** Pull
- Earnings determined by ***your*** decisions ***and*** decisions made by person you have been matched with.



## Part 1 Earnings

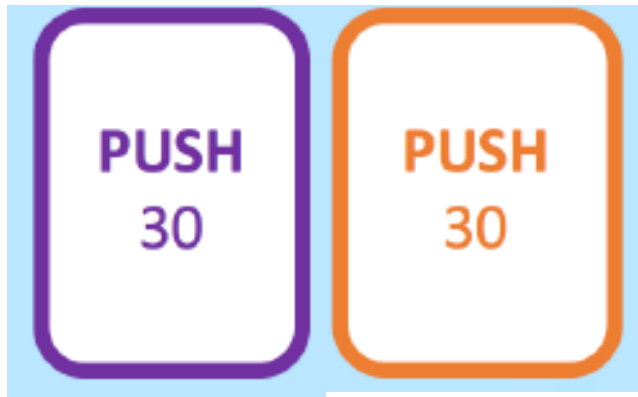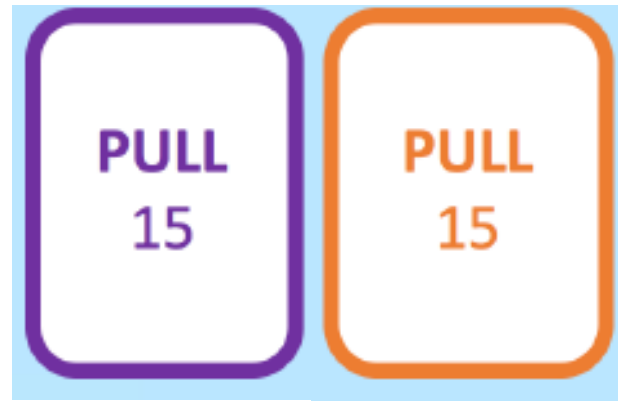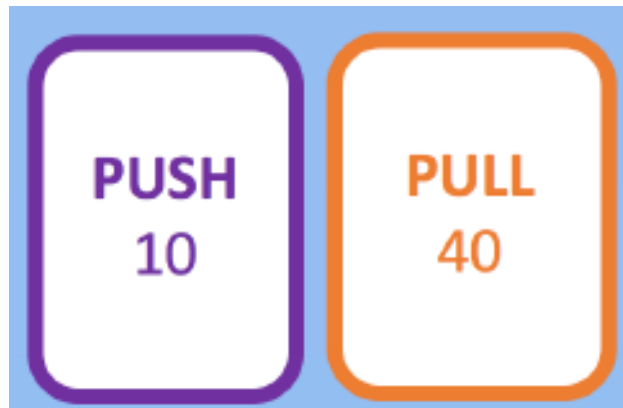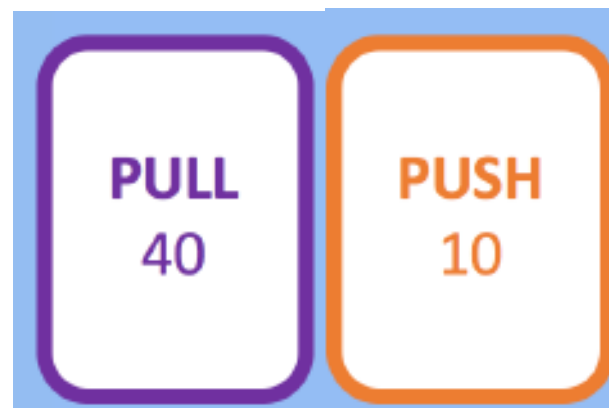

Round

1 out of 9

Please make your push or pull decision for Part 1 of Period 1 ☐ Pull  
☐ Push

OK

Round

1 out of 9

Please make your push or pull decision for Part 1 of Period 1 ☐ Pull  
☐ Push

OK

Round

1 out of 9

Please make your push or pull decision for Part 1 of Period 1 ☐ Pull  
☐ Push

OK

Round

1 out of 9

Please make your push or pull decision for Part 1 of Period 1

☒ Pull

☐ Push

OK

Round

1 out of 9

Please make your push or pull decision for Part 1 of Period 1

☐ Pull

☒ Push

OK

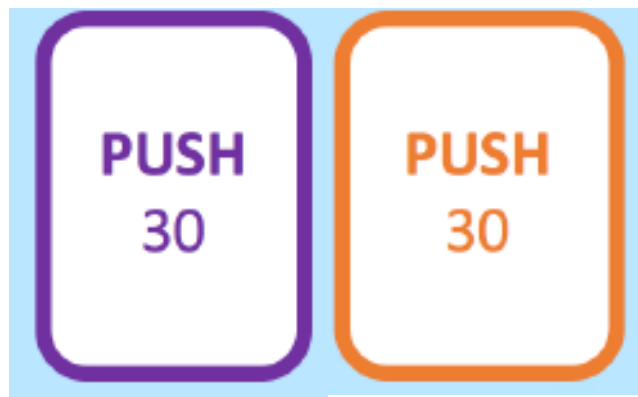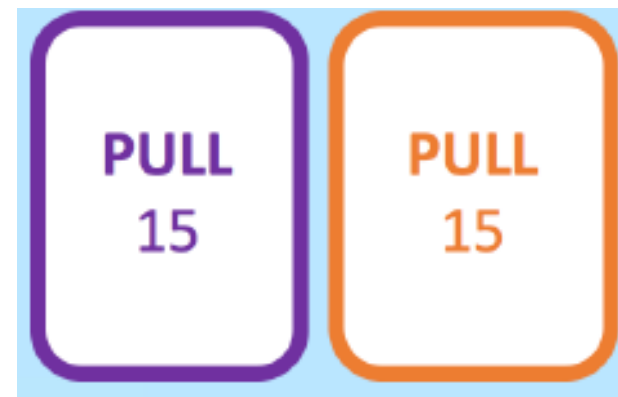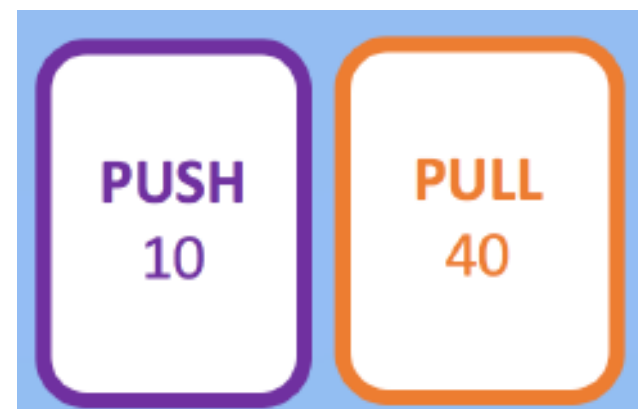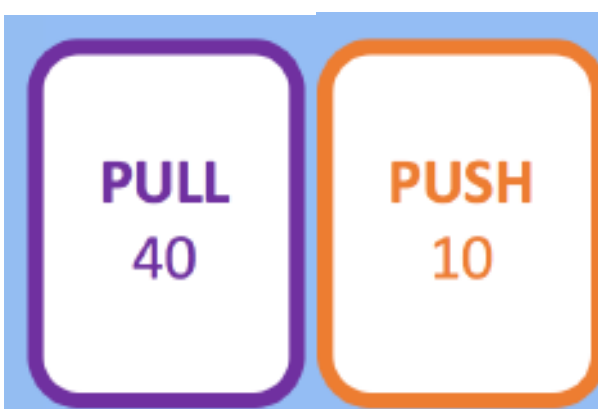

# TASK 1: PART 2

PERIOD 1



## Part 2 of Task 1

- Push *or* pull
- ***One person's*** choice in each pair will be *ignored*.

## Part 2

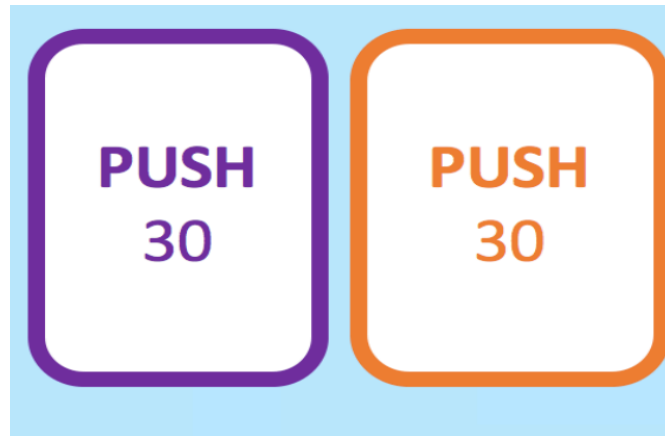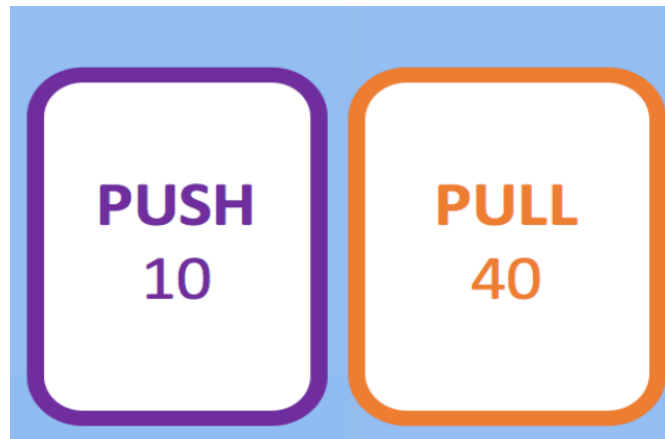

Round

1 out of 9

Please make your push or pull decision for Part 2 of Period 1

- ☐ Pull
- ☐ Push

OK

## Part 2 Earnings

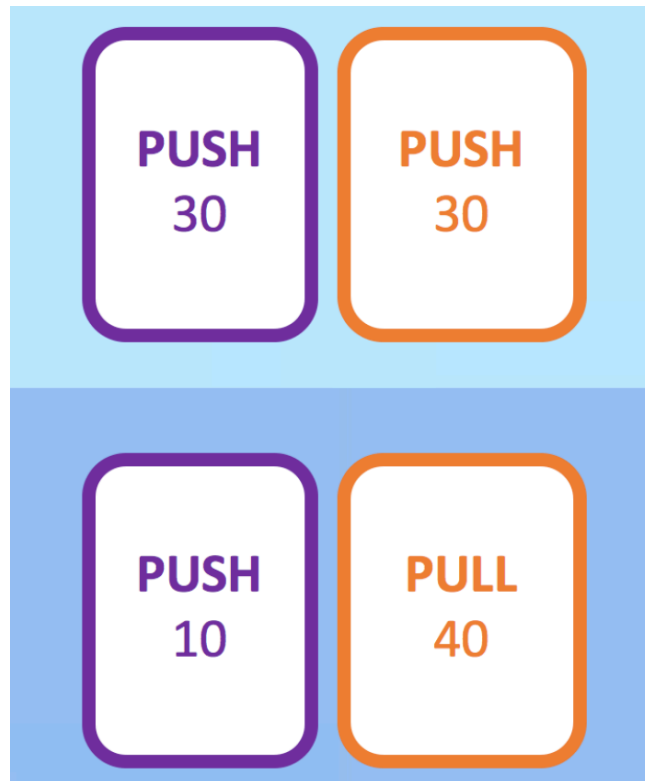

Round

1 out of 9

The part of Period 1 that has been randomly chosen to determine payment is Part 1

The number of tokens you have earned from Part 1

The number of tokens your partner has earned from Part 1

OK

Round

1 out of 9

The part of Period 1 that has been randomly chosen to determine payment is Part 1

The number of tokens you have earned from Part 1

The number of tokens your partner has earned from Part 1

OK

Round

1 out of 9

The part of Period 1 that has been randomly chosen to determine payment is Part 1

The number of tokens you have earned from Part 1

The number of tokens your partner has earned from Part 1

OK

Round

1 out of 9

The part of Period 1 randomly chosen to determine payment is Part 2

Your choice has been ignored

The number of tokens you have earned from Part 2

The number of tokens your partner has earned from Part 2

OK



Round

1 out of 9

The part of Period 1 randomly chosen to determine payment is Part 2

Your choice has been ignored

The number of tokens you have earned from Part 2

The number of tokens your partner has earned from Part 2

OK

Round

1 out of 9

The part of Period 1 randomly chosen to determine payment is Part 2

Your choice has been ignored

The number of tokens you have earned from Part 2

The number of tokens your partner has earned from Part 2

OK

Round

1 out of 9

The part of Period 1 randomly chosen to determine payment is Part 2

Your choice has been ignored

The number of tokens you have earned from Part 2

The number of tokens your partner has earned from Part 2

OK

WE HAVE NOW COMPLETED PERIOD 1 OF THE SESSION. PLEASE WAIT FOR FURTHER INSTRUCTIONS.

# TASK 2

PERIOD 2 TO 9

## Period 2 to 9

- You begin ***each period*** with the tokens you earned in ***Task 1***
- ***Endowment = earnings from Task 1***
- The task is ***exactly*** the same for ***all*** periods
- ***Four*** people in each group (***randomly*** matched)
- Groups ***do not*** change between periods 2 to 9.
- You will ***not*** be in the same group as the person you were matched with in period 1
- Endowments in group may ***differ***.

## Period 2 to 9

- Allocate endowment to ***Account A or Account B***
- ***Only*** allocate ***whole numbers***
  - ***0 to endowment***
- Everything in ***Account A is yours***
- Add ***all allocations in each period*** to Account B and ***double***
- ***Total*** tokens in ***Account B*** divided ***equally to all people in group***
- Earnings ***in each period*** are Account A ***plus*** income from Account B

# Example 1

- Everyone has an ***endowment of 20 tokens***
- Everyone allocates ***0 tokens to Account B***
- Total tokens in ***Account B = 0 tokens (0 + 0 + 0 + 0)***
- Everyone therefore has ***20 tokens in Account A***
- 0 tokens in Account times ***2 therefore 0 tokens in Account B***
- 0 tokens ***divided equally to whole group***
- Everyone's income from ***Account B therefore is 0 tokens***
- Each person earns 20 tokens in Account A ***plus*** 0 income from Account B
- Total earnings from ***period = 20 tokens***
- Everyone begins ***Period 2 with 20 tokens***



## Example 2

- Everyone has an ***endowment of 20 tokens***
- Everyone allocates ***20 tokens to Account B***
- Total tokens in ***Account B = 80 tokens (20 + 20 + 20 + 20)***
- Everyone therefore has ***0 tokens in Account A***
- 80 tokens in Account times ***2 therefore 160 tokens in Account B***
- 160 tokens ***divided equally to whole group***
- Everyone's income from ***Account B therefore is 40 tokens***
- Each person earns 0 tokens in Account A ***plus*** 40 income from Account B
- Total earnings from ***period = 40 tokens***
- Everyone begins ***Period 2 with 20 tokens***

Round

2 out of 9

The number of people in your group with 40 token endowments

The number of people in your group with 30 token endowments

The number of people in your group with 15 token endowments

The number of people in your group with 10 token endowments

Your endowment

Please enter the number of tokens you are allocating to Account B

OK

The number of people in your group with 40 token endowments

The number of people in your group with 30 token endowments

The number of people in your group with 15 token endowments

The number of people in your group with 10 token endowments

Your endowment

Please enter the number of tokens you are allocating to Account B

OK

Round

2 out of 9

The number of people in your group with 40 token endowments

The number of people in your group with 30 token endowments

The number of people in your group with 15 token endowments

The number of people in your group with 10 token endowments

Your endowment

Please enter the number of tokens you are allocating to Account B

|

OK

Round

2 out of 9

The number of people in your group with 40 token endowments

The number of people in your group with 30 token endowments

The number of people in your group with 15 token endowments

The number of people in your group with 10 token endowments

Your endowment

Please enter the number of tokens you are allocating to Account B

OK

Round

3 out of 9

The number of people in your group with 40 token endowments

The number of people in your group with 30 token endowments

The number of people in your group with 15 token endowments

The number of people in your group with 10 token endowments

Your endowment

Please enter the number of tokens you are allocating to Account B

OK
